# Supplementary material
Source: MDPI journal article supplement (https://www.mdpi.com/2311-7524/9/9/991)
Supplement: s1 [file s1]

Table S1 List of primers used in this study

| Primer name       | Primer sequence            |         |
|-------------------|----------------------------|---------|
| CoBBX24-ORF-F     | ATGAAGATCCAGTGTGATG        | clone   |
| CoBBX24-ORF-F     | ACCTAGATCAGGAACAGTG        | clone   |
| RT-CoBBX24-F      | GCTGCTCCTTCAATCCCTCT       | qRT-PCR |
| RT-CoBBX24-R      | CTCATCACAAATCCCGACAGA      | qRT-PCR |
| TUB $\alpha$ -3-F | CCATGCCTTGGATCACATTT       | qRT-PCR |
| TUB $\alpha$ -3-R | TGGGGCCATTAATGTAGACG       | qRT-PCR |
| Actin2-F          | GGTAACATTGTGCTCAGTGGTGG    | qRT-PCR |
| Actin2-R          | AACGACCTTAATCTTCATGCTGC    | qRT-PCR |
| AtABF4-RT-F       | AGCTAGTTACGGAGGAACCG       | qRT-PCR |
| AtABF4-RT-R       | AGCACATACGGAAGTGGTGA       | qRT-PCR |
| AtSAG12-RT-F      | TGATGAGCAAGCACTGATGA       | qRT-PCR |
| AtSAG12-RT-R      | TGCACTCTCCAGTGAACACA       | qRT-PCR |
| AtSAG29-RT-F      | AACGTTGCCTTCTTCTCGTT       | qRT-PCR |
| AtSAG29-RT-R      | TTTATCACACGAGCCACGAT       | qRT-PCR |
| AtNYE1-RT-F       | GCAAGGATGGGCAAATAGG        | qRT-PCR |
| AtNYE1-RT-R       | CACCGCTTATGTGACAATGAAC     | qRT-PCR |
| AtNYE2-RT-F       | GACGAAGTAGTGGGCGAGTG       | qRT-PCR |
| AtNYE2-RT-R       | CGATGAGATTCAAGAAGAAGTGG    | qRT-PCR |
| AtNYC1-RT-F       | TATAGTTGGCTTGGTGGAA        | qRT-PCR |
| AtNYC1-RT-R       | GATTCAGAACTGCGAGATG        | qRT-PCR |
| BD-CoBBX24-F      | GGAATTCATGAAGATCCAGTGTGATG | Y2H     |
| BD-CoBBX24-R      | GCGGATCCCGGCATCAGAGTTGG    | Y2H     |

CoBBX24 ORF:

ATGAAGATCCAGTGTGATGTGTGTGAGAAAGCTCCAGCAACTGTGATCTGTTGCGCTG  
ATGAGGCTGCCCTATGTGCAAAATGTGACATAGAAGTTCATGCAGCAAACAAGCTTGC  
AAGCAAGCACCAAGAGGCTGCTCCTTCAATCCCTCTCCAACAACTCCCTCCATGTGAC  
ATATGTCAAGAGAAGGCAGCTTTTCAATTTTTTGTGTGGAAGACAGGGCTCTCTTCTGTGCG  
GGATTGTGATGAGCCAATCCATTCTGCTAGTAGCCTCTCTGCAAACCACCAGCGGTTTC  
TTGCCACCGGAATCCGAGTTGCTCTCACTTCAAGTTGCACGAAGGACAGTGAGAAGA  
GCAACCAAGATCCAGAGCCAGAGCCACCTAATCATAATGCACAATCGGTTAGCATCAA  
AATGCCACACAGCAATCTTCAAGCTTCACTTCACCATCGTGGGCTGTTGATGACTTAT  
TGCATCTCTCAGATATTGAATCTTCTGATAAGAAAGAACAACCTTGAGTTTGGAGAGCTA  
GAATGGTTCACAGACATTGGTCTCTTTGGTGAGCAAGTTCCTCGCGAGGCGTTAGCTC  
TTGCTGAAGTGCCCTCAGCTTCCAGTGCCACAGTTAAGCAATGCCACTTCATACAGACC  
CACCAAATTGAACATGCCCTACAAGAAGCCTAGAATTGAAATCACGGATGAGGATGAT  
GAGTATTTCACTGTTCCCTGATCTAGGT

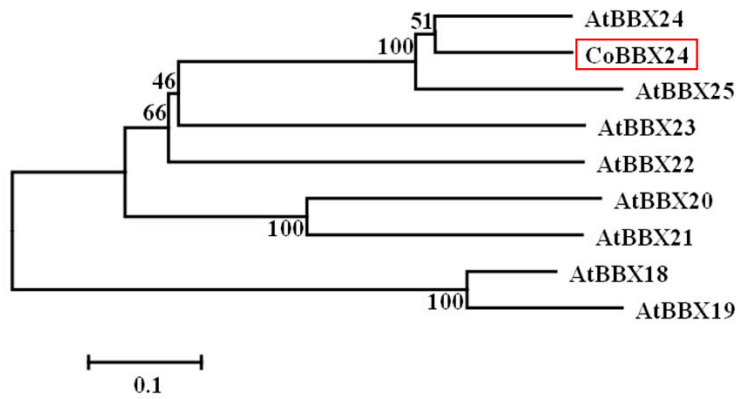

**Figure S1.** The phylogenetic tree of the *Arabidopsis* BBX family and CoBBX24. The phylogenetic trees were derived using the neighbor-joining (NJ) method with a bootstrap value of 1,000 replicates. Bootstrap values indicate the divergence of each branch, with the scale representing the branch length.

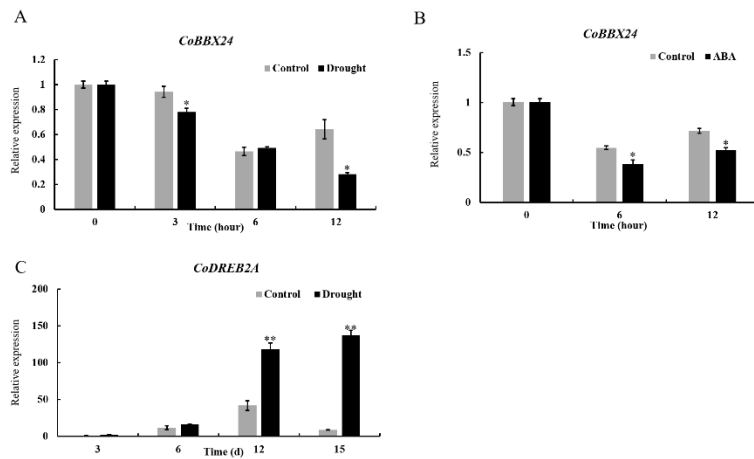

**Figure S2.** Transcriptional profiling of *CoBBX24* and *CoDREB2A* under drought stress or ABA treatment. (A) For assays on the effects of water deficit, plants were exposed to air drying at room temperature, the control group was cultured normally, samples were harvested 0, 3, 6, and 12 h after the water deficit. (B) For ABA assay of oil tea trees, 100  $\mu$ M of ABA was sprayed, and the control group was sprayed with water containing an equal amount of ethanol. The sample was harvested 0, 6, and 12 h after spraying the ABA. (C) Transcriptional profiling of *CoDREB2A* under drought stress.

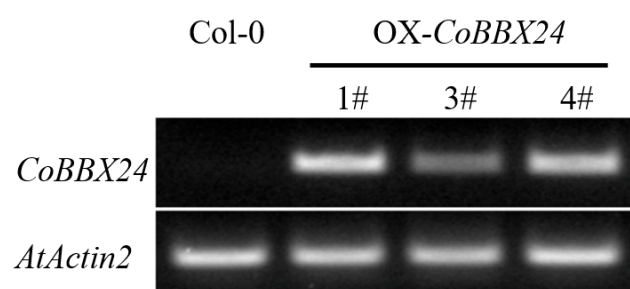

**Figure S3.** RT-PCR analysis of *CoBBX24* expression in WT and transgenic lines. *Actin2* was used as the reference gene.

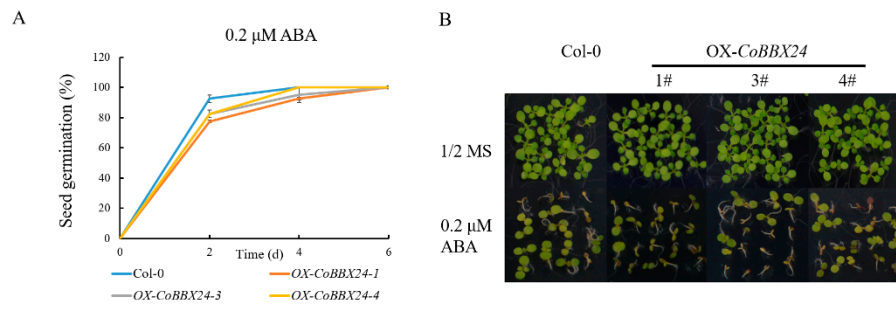

**Figure S4.** Overexpression of *CoBBX24* in *Arabidopsis* enhanced seedling sensitivity to ABA treatment. (A) The effect of the ABA treatment on germination in the presence of 0.2  $\mu$ M of ABA. Whiskers indicate the SE (n=3). (B) The appearance of seedlings of WT and three transgenic lines grown for 5 days on solidified medium containing 0.2  $\mu$ M of ABA.

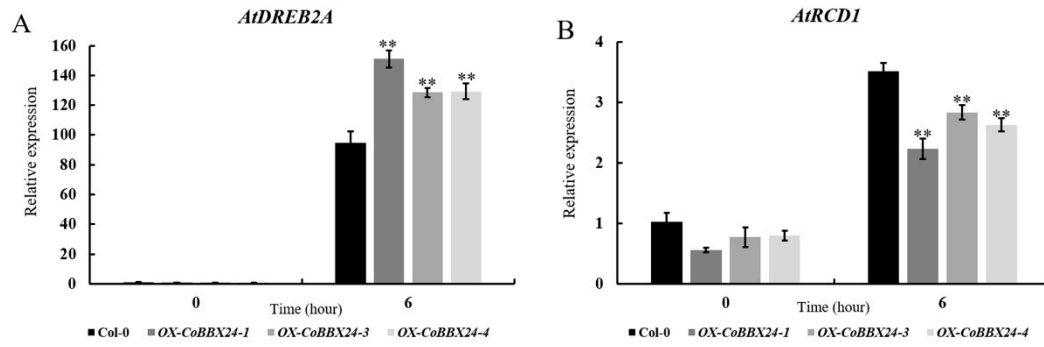

**Figure S5.** qRT-PCR assay to examine the expression of genes in *CoBBX24ox* and WT plants under drought treatment. The *OX-CoBBX24* transgenic lines and WT plants were exposed to air drying at room temperature, samples were harvested 0 and 6 h after the water deficit. The *Arabidopsis Actin2* was used as the reference gene for normalization. Error bars indicated the SD, (n = 3). Significant differences were determined by Duncan's test (\* P < 0.05, \*\* P < 0.01).
